# Supplementary material
Source: PubMed Central journal article supplement (PMC4468545)
Supplement: IAI.00106-15_zii999091290so1.pdf [file IAI.00106-15_zii999091290so1.pdf]

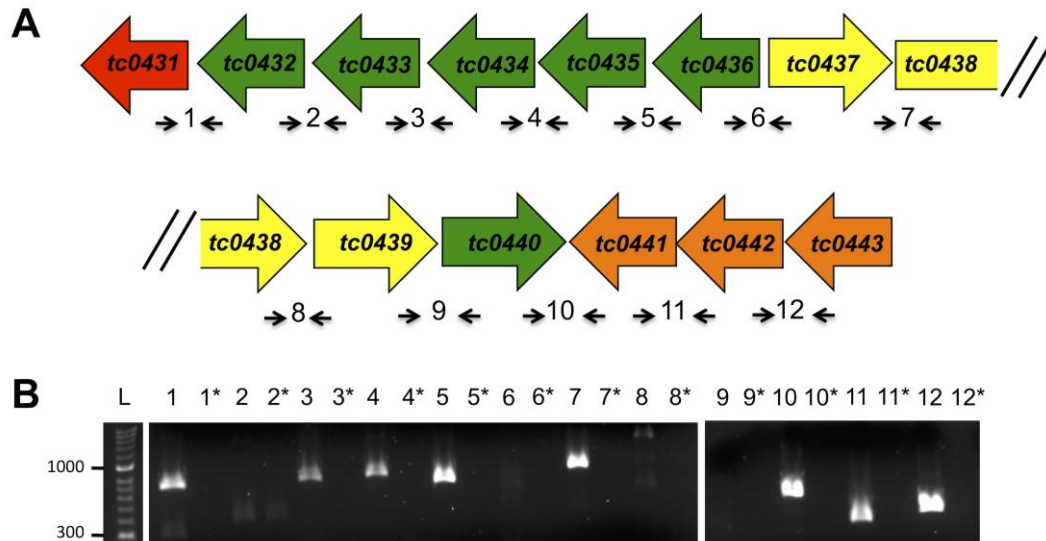

**Fig. S1. Several *C. muridarum* PZ genes are encoded in operons. (A)**

Diagram of the *C. muridarum* PZ from *tc0431*(*MACPF*) to *tc0443* (*guaB*) with

locations of primers. (B) Agarose gel of RT-PCR amplification products and

RT-negative control samples (\*).

TABLE S1. Primers for RT-PCR

| Gene ID       | Forward primer sequence (5' to 3')     | Reverse primer sequence (5' to 3')    | Product size (bp) |
|---------------|----------------------------------------|---------------------------------------|-------------------|
| <i>tc0431</i> | ATG CCC CAC TCT CCT TTT TTA TAT GTT    | CAA GTA GCT ACG CAG GCA GAT AG        | 272               |
| <i>tc0432</i> | GTC AGT CAT TTG TAA GCT TAT GAA CCA GG | GCT ACT CGA GTC GCC AAC ATA GC        | 342               |
| <i>tc0433</i> | GTG CTC TCC TTG TTC ACG TCA TAT C      | GCT CTC AGT CCT ACG TGC TTT AAG G     | 292               |
| <i>tc0434</i> | ATG ACC GCA CCT TTA ATA ACT ACC AC     | GTT GCA GAG AGA ATG GCG TGT TC        | 317               |
| <i>tc0435</i> | GGT CTC TCC TTT AAT AAC TAC CAC CTC    | GAA GAC GGA ACA ACG TTC TTC AGA ACG   | 291               |
| <i>tc0436</i> | CGA TAC AAG GTG TGT CCG TAA GC         | CTC CAT TAA ACT AGC GAG ATG CAT G     | 251               |
| <i>tc0437</i> | CCC CCT TCA GCA ATT TCA                | TCT GAA GAA ACT GTA GGC TGT TTA C     | 399               |
| <i>tc0438</i> | CCT GTT TCC GGT TCA ATT GTT GCA T      | CGT ATC TTT AGA AGT GAA GCG A         | 406               |
| <i>tc0439</i> | GTT AGG CAA GCC AAA ATT CTA G          | CTA CTC CTT TGA GCT GGC AGT AG        | 550               |
| <i>tc0440</i> | GTC ACT GAC TGC CCA ACT TG             | GAT AGT GCG AAC TGC TAA TCG G         | 816               |
| <i>tc0441</i> | GAA GCT CGC TTA CGA TTG TAC GAT C      | CGC TGA GCT TAT GGT CTC TAA ATA ATG C | 574               |
| <i>tc0442</i> | GAA CTC GGA CTC CTA AAC CAG G          | GCG CTT ATT CCC ACT CAA TAG TTG C     | 339               |
| <i>tc0443</i> | ATG CGC GAA GCT CTG ACT TTT GAT G      | GAG AAC CCA TAC CTC GAT ACA TCT TGT   | 781               |
| <i>tc0444</i> | ATG GGC GCC AAT AAG ATA C              | TTA TTC GAT TTT TGG AGA AAAAAT GTT C  | 363               |
| <i>tc0445</i> | ATG GGC GCC AAT AAG ATA CAC GC         | CCC TGT AAC CTC TGC ATT CGG ATT C     | 153               |
| <i>tc0446</i> | GGC TTA ACG TCT TGT CAC CAG AAA G      | GAT GTA CAA AAC TGG TAG CAA TGC       | 269               |
| <i>tc0447</i> | CAG CTG CTT CAT CCT ATC TCC GC         | CTG TGA CAA CGG ATT AGT TCT G         | 400               |
| <i>euo</i>    | ATG GAA TGC TTA CAA CAA GAT AC         | CTA AGA AAC AAA ATC CTC TGA GTC       | 345               |
| <i>omcB</i>   | ATG CGA ATA GGA GAT CCT ATG AAC        | GCA CGA TTT CTA CAT TAC GAT CAT C     | 340               |
| <i>ompA</i>   | ATG AAA AAA CTC TTG AAA TCG GTA TTA GC | CTT GCA TAT GCT TGC CAT AAG C         | 340               |

TABLE S2. Primers for qRT-PCR

| Gene ID       | Forward primer sequence (5' to 3')     | Reverse primer sequence (5' to 3')     | Product size (bp) |
|---------------|----------------------------------------|----------------------------------------|-------------------|
| <i>tc0431</i> | GAG AGC GGC ACC CTA TTA CTT TAG ATT TC | GAT TCC CTA GAC AAG ACA TAA GAG GCT TC | 140               |
| <i>tc0436</i> | GGA CCC GAT TCG AGG GTT TC             | CAC GAG AGG AAA CGC TCT TGT AAT ACG    | 117               |
| <i>tc0437</i> | CGC CTC GCG CTT AAA GTT GAC TG         | GGA CTG TTT GAC TAG CAG ATC CTT GTC C  | 123               |
| <i>tc0438</i> | CTC AAG TTC CTT TTA CAA CCT CTC CTG C  | CTC GGA TGG GTT GTA TAG TCG AAG G      | 116               |
| <i>tc0439</i> | CGA ATA CAG CCT CTT CCA CAG TTT C      | CTA TTG CTT TGA GCA ACA GGG TGA G      | 89                |
| <i>tc0440</i> | CCT ATA GTC ACT GAC TGC CCAAC          | GCT GCT GCT GTT GTC GAT GAG AG         | 77                |
| <i>tc0441</i> | GAT GCG GCT TCA TCG AGC CAA CTC        | CCT GAG TCA AGG AAT TAC CCT TCG        | 122               |
| <i>tc0442</i> | GGA AGT CCA CCT ACA TTA TGG            | CAT AGG AGC CGC CTT TAT CG             | 158               |
| <i>tc0443</i> | GAG AAC CCA TAC CTC GAT ACA TCT TGT    | CGC ATT GTG TTA TGC TCG GTA G          | 107               |
| <i>euo</i>    | GAG CAG CAA GAA GAG GAG AAT GC         | GCG ACA TAG ATA GCC TGA CGA GTC        | 104               |
| <i>omcB</i>   | GTG CTT GTC CAG AGA TCC GTT CG         | CTG TTG CTG TTC CTT GGT TGA CTA C      | 128               |
| <i>ompA</i>   | GCA TCA AGA GAG AAT CCC GCT TAT G      | CCG CTA GTT GCT CCC AAT GTA C          | 138               |

**TABLE S3. Primers for PZ operon analysis**

| No. | Gene ID                | Forward Primer (Sequence 5' to 3')      | Reverse Primer (Sequence 5' to 3')     | Product size (bp) |
|-----|------------------------|-----------------------------------------|----------------------------------------|-------------------|
| 1   | <i>tc0431 - tc0432</i> | GGT CAT TCG TAG GAC TGG CAA G           | CAA GTA GCT ACG CAG GCA GAT AG         | 668               |
| 2   | <i>tc0432 - tc0433</i> | CCA CTT CGT GTA CGC AAG CC              | GCT ACT CGA GTC GCC AAC ATA GC         | 1223              |
| 3   | <i>tc0433 - tc0434</i> | CGT CGG CTC CTC TAA CTG GTC             | GCT CTC AGT CCT ACG TGC TTT AAG G      | 693               |
| 4   | <i>tc0434 - tc0435</i> | CCA CTG CCA TTA TCG GCT GC              | GTT GCA GAG AGAATG GCG TGT TC          | 723               |
| 5   | <i>tc0435 - tc0436</i> | GAT GAA GCC GCC TCA CAA CG              | GAA GAC GGA ACA ACG TTC TTC AGA ACG    | 657               |
| 6   | <i>tc0436 - tc0437</i> | GCT GTT GCA GCA TCG CAC                 | CGA TTT GAT GGC AAG AGC TCG G          | 1448              |
| 7   | <i>tc0437 - tc0438</i> | CTC GGA TGG GTT GTA TAG TCG AAG G       | CGA GAT GCC GTA CCT CAA TGG            | 795               |
| 8   | <i>tc0438 - tc0439</i> | CCA GTA TGG TTA GAT GGA GAT GCC G       | GCC TGC TGG CAG CAT TCA AG             | 1161              |
| 9   | <i>tc0439 - tc0440</i> | GCA ATG GGT CTG GGT ACG C               | CGA ACA ATC CTT CCT AGC TGG G          | 1136              |
| 10  | <i>tc0440 - tc0441</i> | GGC TCC GGC TAT TAA CCT GGT AC          | GTG CTC CAC GTG TGC ATG TC             | 811               |
| 11  | <i>tc0441 - tc0442</i> | CTC TTG TGA GGG TTC CCA TTC GAG         | CAC AAG GTT AGC CAA GCA TTT GCT G      | 514               |
| 12  | <i>tc0442 - tc0443</i> | GGA GGA ACA ACA ACA CAA TCA CAA TGA CTC | GAG GGA TTC GAT CAG GAA TGG GCT ATT TG | 592               |

**TABLE S4. Primers for cloning PZ fragments into the pAC-lacZ vector**

| Construct | Forward primer sequence (5' to 3')                            | Reverse primer sequence (5' to 3')                  | Genbank Coordinates flanking Construct |
|-----------|---------------------------------------------------------------|-----------------------------------------------------|----------------------------------------|
| 1         | ATA ATA TCG CGA ACC AAT GCG AAC AAC ATC TTC TGT               | GCT CTT CGG CCG GTA ATA CGA AAA GGT GTG TTT C       | 506506-505406                          |
| 2         | TAA TAA TCG CGA ATG GAC CCG ATT CGA GGG TTT CAC CAG           | AAG TGC CGG CCG CAC CAA GTG CAC AAA TC              | 505479-504381                          |
| 3         | ATC ATA TCG CGA AAA CTG TTA TCA TCG GCT CCG CTA ATT GGT CCG   | GAT TAG CGG CCG CAT TTT GTC TGC GGG TAG GCC         | 504505-503381                          |
| 4         | ACA AAC TCG CGA AAT ACA CCC TTG AAA AGC TAT CCT CTC AC        | CAG CGA CGG CCG GTT CTG GGC TAT TTA CTC GC          | 503476-502487                          |
| 5         | CGT TCA TCG CGA CTA TTT CAC AAA AAA ACT CTT ATC ATT GAT AAA C | GTT TTG CGG CCG CTA GAA GTC TCT AAC GAA TGA         | 502509-501488                          |
| 6         | GAA GAT TCG CGA TTG TTT ATC GTT CGA AAT CTA ACA GCA C         | AGA GAT CGG CCG GGT TGT TGT TGC AGG ATA ATC         | 500724-499715                          |
| 7         | ACA ACC TCG CGA ATC TCT ATT CCA CAG AAA ATC GCT GG            | GGC AGA CGG CCG TAG TTT GGG TTC TAG AAC GG          | 499715-498724                          |
| 8         | TTT ATT TCG CGA GAA AAC CTA CCT TTA GAA ATT TTT GGA GCC       | GGC TTG CGG CCG CTG AAA ACG CTG CTG                 | 498833-497707                          |
| 9         | ATA ATA TCG CGA GTT CCA ATG TAG TTT GGA TGA CC                | ATA ATA CGG CCG CAA CAA TCC ATC CAC AAC GTT C       | 497801-496846                          |
| 10        | CAT AGG TCG CGA TTC TTT ACC TAT TCG ACA AAA GAT TTT TGG C     | GCT GAG CGG CCG TAG AAT TAT GGG AAT TCT TAT TG      | 496910-495810                          |
| 11        | CCT GAA TCG CGA GCT CCG GTA ATC GCA ACC TCT CC                | GAG CCT CGG CCG CGC TCT CTG TCT CAG TAC ATT         | 495919-494389                          |
| 12        | ATC ATA TCG CGA GTG CTC TTG AAC ATC TGG AG                    | ATC ATA CGG CCG GTT GTG TAA TAG TGC GTG G           | 505999-504971                          |
| 13        | ATCATA TCGCGA GTC CAA AAC AAC TAT AGA GCT AAT CCA G           | ATC ATA CGG CCG GTC TTA TGA GGG CAA TGT ATG         | 504984-503936                          |
| 14        | ATC ATA TCG CGA GAA CGT TGT TCC GTC TTC TAA ATC               | ATC ATA CGG CCG GTG GTA GTT ATT AAA GGT GC          | 503977-503108                          |
| 15        | CTG ATA TCG CGA GTA AGT TAG ATA GGC TGC G                     | ATA ATA CGG CCG GAA GAG TCA GCG TTT TCG             | 503120-501964                          |
| 16        | GTG GTC TCG CGA GTG AGA ATA GTA CTG CTA TAA C                 | ATA ATA CGG CCG GAT GGA AGA CAA TGG AGA G           | 501974-501177                          |
| 17        | ATA ATA TCG CGA CGC TGG TTG TTG ATC ACA GAA TG                | ATA ATA CGG CCG GTC TCT AAC GAA TGA CGA TTG C       | 501231-500093                          |
| 18        | GTG GTA TCG CGA GAT CTC TCC CAT CGA GTT ATT TAT G             | ATA GTA CGG CCG CTG ATA AGG ATT GGC ATT GAG         | 500098-499295                          |
| 19        | ATA GTA TCG CGA GGA TCT TCT AAT TGG TCA TTC GTA GG            | ATA ATA CGG CCG GTC ACA AGA ATT TCC TGC TGT C       | 499340-498170                          |
| 20        | GTA GTA TCG CGA CTT TTT GTG TAC CAC CTC TTA CC                | ATA ATA CGG CCG GAC ACT TTC AGA CCA ATC TTT AAA ATC | 498229-497370                          |
| 21        | ATA ATA TCG CGA CAG CAC GGA ATC TGG CTA CTC TAC               | ATA ATA CGG CCG GAT GAA CCT TCT GGG AAC CTG         | 497473-496327                          |
| 22        | ATA ATA TCG CGA CAG CTA ACT CTC GAT CAT GAG TTA CG            | ATA ATA CGG CCG GCT TGT TCC AAT ATT GTG ACC         | 497415-495248                          |
| 23        | GTA CGA TCG CGA TTC CTG CTT GAT TTT TC                        | GAT ATA CGG CCG GTG TTT ACT TGA TCT AG              | 504810-505810                          |
| 24        | ATA CAG TCG CGA GAA CCT TAA TTG GGC                           | TAA ATA CGG CCG GTT CCA AGA GAA AAC GGC TTA         | 525699-526699                          |
| 25        | CTC ACG TCG CGA ATA AAA GCT TAT CAA TTG                       | ATA TTA CGG CCG GAA CAA TGC TTG GC                  | 525199-526199                          |
| 26        | ATA CGA TCG CGA ATG CAA CAA CAC TAA AAT T                     | ATA TTA CGG CCG CTT GTC TTT AGA TGT GC              | 524699-525699                          |
| 27        | ATA TAA TCG CGA ACC CAA GAA TAG CGA AG                        | ATC CGA CGG CCG TGT TTT TTA TTT TAA CAA AG          | 535815-536815                          |
| 28        | ATT TAT TCG CGA CTA GCA ACC CAT CGG C                         | ATA CTA CGG CCG CGT TCT TCT TCT GTT GTC             | 535315-536315                          |
| 29        | TAT TCG CGG CCG TGC TCT TTC TAA ACC TTG                       | CGC AGG CGG CCG TAA ATC CCT TAA AAT AAG             | 541942-542942                          |
| 30        | TAT TCG CGG CCG TGC TCT TTC TAA ACC TTG                       | CGC AGG CGG CCG TAA ATC CCT TAA AAT AAG             | 542942-541942                          |

**TABLE S4. Cont.**

| <b>Construct</b> | <b>Forward primer sequence (5' -&gt; 3')</b> | <b>Reverse primer sequence (5' -&gt; 3')</b>   | <b>Genbank Coordinates flanking Construct</b> |
|------------------|----------------------------------------------|------------------------------------------------|-----------------------------------------------|
| 31               | TTA TTA CGG CCG TAG CGT TCA GCA CTA CC       | ATA TGC CGG CCG GTC GAT TTA ATT TCC            | 541442-542442                                 |
| 32               | TTA TTA CGG CCG TAG CGT TCA GCA CTA CC       | ATA TGC CGG CCG GTC GAT TTA ATT TCC            | 542442-541442                                 |
| 33               | GTG CTA CGG CCG CGA AAA TAA AAG TTA ATA A    | ATT CGA CGG CCG AAA CTT TTT TTT AGG CAT AAA G  | 543885-542868                                 |
| 34               | TTA ATA CGG CCG TAG GTT GGA GGG ATT GTA ATG  | CGC AGA CGG CCG ACT TTA GTA AAA AAA AGG        | 542368-543368                                 |
| 35               | TTA ATA CGG CCG TAG GTT GGA GGG ATT GTA ATG  | CGC AGA CGG CCG ACT TTA GTA AAA AAA AGG        | 543368-542368                                 |
| 36               | GTA CGA TCG CGA GTT GTA GGG TTT GAT AAT GG   | ATT CGA CGG CCG AAA CTT TTT TTT AGG CAT AAA G  | 542868-542368                                 |
| 37               | GCA TGA TCG CGA ATC CAA GAA AAT AGT GAT GAA  | GCA TGA CGG CCG ATT ATC TCC TAT TTC CCT CG     | 505347-506310                                 |
| 38               | GCA TGA TCG CGA GAG ATA ATA TGC CCC CTT CA   | GCA TGA CGG CCG CTA CCC AAA ATA AAA AAT CAA AC | 506322-507296                                 |
| 39               | GCA TGA TCG CGA GAG TAA AAA TTG ACA GTC      | GCA TGA CGG CCG ACT TGA TTT TTG TTT ATT CTC    | 507174-508174                                 |
| 40               | GCA TGA TCG CGA GGT TTC AGA TGG GGT TTT GAG  | GCA TGA CGG CCG CAC ACA CTT GAT TAC GAA GAA    | 508021-509021                                 |
| 41               | GCA TGA TCG CGA CGA GTT GCT AGA TCG ATT      | GCA TGA CGG CCG CTA ATC TAG CAG ATG GAG        | 508915-509906                                 |
| 42               | GCA TGA TCG CGA TTT AAC AGA GAT CAC TCG GTA  | GCA TGA CGG CCG CCT CAT CTT CTA TGG ACA TAT    | 509812-510803                                 |
| 43               | AAG TAT TCG CGA ACT TTG TTA TCT TGG CCA GAA  | TGC CTC CCG CCG AAG AAA TTG AAA TAG AGA TGC    | 510635-511648                                 |
| 44               | AAA CAT TCG CGA GTT TTA GAT TCT GAA ACG GTA  | ATA ATT CGG CCG TAA AAG AAA ATT TCC TAA AAC    | 511514-512566                                 |
| 45               | CTT TAC TCG CGA CCT CTT TGA TGC TAG CTG TGG  | TTC CTC CGG CCG TTC CTT TAC CTG AAT AAA TAG    | 512355-513353                                 |
| 46               | GTA GAA TCG CGA CAA GAT GTT CCG CTG ATA AGG  | CCA TAA CGG CCG GAT TCC AAT AAC TTG GGT TTC    | 513179-514220                                 |
| 47               | TAA GTT TCG CGA CCA TTC TAC CAA CTC TTA TAT  | CTT GTC CGG CCG AAC TAA AAT CGC TAA ATT GAG    | 514008-514987                                 |
| 48               | ATG GGA TCG CGA TTA ATT AAT CCT GCA TAT AGA  | TCC TAA CGG CCG AGG TTT CAA GAA TGC GTC TAA    | 514913-515896                                 |
| 49               | ATG GGA TCG CGA TTA ATT AAT CCT GCA TAT AGA  | GTA CTA CGG CCG GAT TCA CCA ACA CTA TG         | 514913-515353                                 |
| 50               | GTA CTA TCG CGA CTT CAC ATA GTG TTG GTG      | TCC TAA CGG CCG AGG TTT CAA GAA TGC GTC TAA    | 515330-515896                                 |
| 51               | GCA TGA TCG CGA GTA TTC CTA TAG CTT TAA      | GCA TGA CGG CCG ATT GTA ATT AGT AAT AGC        | 515787-516852                                 |
| 52               | CTC AAT TCG CGA CAG CCT CGG TCT TAG TC       | GCC CAT CGG CCG TCC TGA TCG AAT CCC            | 542301-541321                                 |
| 53               | CTG AAA TCG CGA TTG GTG TGG ACG CTG          | CTT TGG CGG CCG GCA TTC TAT AGC GGC            | 541784-540688                                 |
| 54               | CAC TGT TCG CGA CCC ATT GCC GCT ATA G        | GGA GTG CGG CCG TCA TCG CTC AAC TCA G          | 540720-539541                                 |
| 55               | GGT AAA TCG CGA GTT CTG GGT TTG CCG          | CAA CTC CGG CCG GCA GCC TCT TCA G              | 540044-538928                                 |
| 56               | CGT ACA TCG CGA GGG GCA TAG ACA TCC          | CGA GTG CGG CCG GAA TAA GTA GCG CAG G          | 539248-538082                                 |
| 57               | GCT CCG TCG CGA GCT ATT AAC CTG GTA C        | GGA CTT CGG CCG CCG ATT AGC AGT TCG C          | 538633-537603                                 |
| 58               | GTC TTG TCG CGA CGA GCA GTT GTT CAA G        | GAT CCT CGG CCG GGA CAA TGG GTT CAG            | 545014-545939                                 |

**TABLE S5. Identification of promoter elements in the *C. muridarum* PZ**

| <b>Construct</b> | <b>Genbank Coordinates flanking Construct</b> | <b>Average <math>\beta</math>-galactosidase activity (Miller Units)</b> | <b><math>\pm</math> SD</b> |
|------------------|-----------------------------------------------|-------------------------------------------------------------------------|----------------------------|
| 1                | 506506-505406                                 | 0                                                                       | 0                          |
| 2                | 505479-504381                                 | 31.28                                                                   | 1.04                       |
| 3                | 504505-503381                                 | 30.78                                                                   | 0.74                       |
| 4                | 503476-502487                                 | 8.66                                                                    | 0.99                       |
| 5                | 502509-501488                                 | 14.21                                                                   | 0.67                       |
| 6                | 500724-499715                                 | 0                                                                       | 0                          |
| 7                | 499715-498724                                 | 52.49                                                                   | 2.06                       |
| 8                | 498833-497707                                 | 0                                                                       | 0                          |
| 9                | 497801-496846                                 | 2.79                                                                    | 0.15                       |
| 10               | 496910-495810                                 | 12.3                                                                    | 0.7                        |
| 11               | 495919-494389                                 | 0                                                                       | 0                          |
| 12               | 505999-504971                                 | 0                                                                       | 0                          |
| 13               | 504984-503936                                 | 0                                                                       | 0                          |
| 14               | 503977-503108                                 | 0                                                                       | 0                          |
| 15               | 503120-501964                                 | 39.46                                                                   | 1.44                       |
| 16               | 501974-501177                                 | 0                                                                       | 0                          |
| 17               | 501231-500093                                 | 0                                                                       | 0                          |
| 18               | 500098-499295                                 | 0                                                                       | 0                          |
| 19               | 499340-498170                                 | 0                                                                       | 0                          |
| 20               | 498229-497370                                 | 105.1                                                                   | 2.23                       |
| 21               | 497473-496327                                 | 150.83                                                                  | 9.75                       |
| 22               | 497415-495248                                 | 0                                                                       | 0                          |
| 23               | 504810-505810                                 | 7.3                                                                     | 7.3                        |
| 24               | 525699-526699                                 | 0                                                                       | 0                          |
| 25               | 525199-526199                                 | 8.3                                                                     | 0.26                       |
| 26               | 524699-525699                                 | 88.64                                                                   | 2.82                       |
| 27               | 535815-536815                                 | 27.63                                                                   | 0.58                       |
| 28               | 535315-536315                                 | 157.17                                                                  | 7.64                       |
| 29               | 541942-542942                                 | 82.87                                                                   | 2.42                       |
| 30               | 542942-541942                                 | 89.2                                                                    | 2.32                       |
| 31               | 541442-542442                                 | 156.1                                                                   | 13                         |
| 32               | 542442-541442                                 | 0                                                                       | 0                          |
| 33               | 543885-542868                                 | 188.76                                                                  | 27.14                      |
| 34               | 542368-543368                                 | 95.77                                                                   | 2.3                        |
| 35               | 543368-542368                                 | 3175.467                                                                | 995.4                      |
| 36               | 542868-542368                                 | 3470.29                                                                 | 115.87                     |
| 37               | 505347-506310                                 | 5.1                                                                     | 2.33                       |
| 38               | 506322-507296                                 | 8.57                                                                    | 3.43                       |
| 39               | 507174-508174                                 | 49.13                                                                   | 1.17                       |
| 40               | 508021-509021                                 | 103.7                                                                   | 4.68                       |
| 41               | 508915-509906                                 | 10.37                                                                   | 1.3                        |
| 42               | 509812-510803                                 | 12.96                                                                   | 2.84                       |
| 43               | 510635-511648                                 | 4.88                                                                    | 1.53                       |
| 44               | 511514-512566                                 | 185.98                                                                  | 24.8                       |
| 45               | 512355-513353                                 | 3.69                                                                    | 1.2                        |
| 46               | 513179-514220                                 | 7.87                                                                    | 0.96                       |
| 47               | 514008-514987                                 | 27.6                                                                    | 2.32                       |

**TABLE S5. Cont.**

| <b>Construct</b>               | <b>Genbank Coordinates<br/>flanking Construct</b> | <b>Average <math>\beta</math>-galactosidase activity<br/>(Miller Units)</b> | <b><math>\pm</math> SD</b> |
|--------------------------------|---------------------------------------------------|-----------------------------------------------------------------------------|----------------------------|
| 48                             | 514913-515896                                     | 1320.84                                                                     | 459.73                     |
| 49                             | 514913-515353                                     | 59.03                                                                       | 6.59                       |
| 50                             | 515330-515896                                     | 1172.97                                                                     | 132.06                     |
| 51                             | 515787-516852                                     | 86.12                                                                       | 1                          |
| 52                             | 542301-541321                                     | 6.75                                                                        | 0.27                       |
| 53                             | 541784-540688                                     | 19.85                                                                       | 3.77                       |
| 54                             | 540720-539541                                     | 70.37                                                                       | 4.96                       |
| 55                             | 540044-538928                                     | 32.84                                                                       | 1.04                       |
| 56                             | 539248-538082                                     | 9.36                                                                        | 0.87                       |
| 57                             | 538633-537603                                     | 19.56                                                                       | 0.71                       |
| 58                             | 545014-545939                                     | 9.43                                                                        | 1.06                       |
| <i>lacZ</i> vector (-) control | -                                                 | 111.04                                                                      | 39.65                      |
| <i>dnaK</i> (+) control        | -                                                 | 518.9                                                                       | 82.39                      |



**TABLE S6. Primers for TILLING**

| <b>Gene ID</b> | <b>Forward primer<br/>Sequence (5' to 3')</b> | <b>GenBank<br/>Coordinates</b> | <b>Reverse primer<br/>sequence (5' to 3')</b> | <b>GenBank<br/>Coordinates</b> |
|----------------|-----------------------------------------------|--------------------------------|-----------------------------------------------|--------------------------------|
| <i>tc0431</i>  | ATG CCC CAC TCT CCT TTT TTA TAT GTT           | 498629                         | ATC AAT TAA CAC GGC TGC AAT TGT ATG           | 497607                         |
| <i>tc0437</i>  | TCT ACG ACG CCT CAA GTC A                     | 506363                         | AAT TTA GCC GCT CCA AAA GC                    | 507325                         |
| <i>tc0438</i>  | CCT GTT TCC GGT TCA ATT GTT GCA T             | 516121                         | GGC TCA TAT ACT GTT CTA TGC CCT C             | 517124                         |
| <i>tc0439</i>  | GAA CAA GCA TTG TGT ACT ATG ACT C             | 526702                         | GCT GCA TCA AAA GCA ATT CG                    | 527714                         |
| <i>tc0440</i>  | ATG TGT TCC CCC TGT CCA CGT C                 | 536815                         | GTG GAG CAC CAG GCT TGC G                     | 537841                         |
| <i>tc0441</i>  | GTT AGA GGT GAA GAT GTC ACA TGA G             | 538405                         | CCA CCG GCA ACT ATT GAG TG                    | 539652                         |
| <i>tc0442</i>  | GCG CTT ATT CCC ACT CAA TAG TTG C             | 539628                         | GCG TGA AGC ATA TTT GCC AGA C                 | 540609                         |
| <i>tc0443</i>  | GCA AGT TAT GGA TGT GGC TTT CAG               | 541225                         | CTC AAT CAG CCT CGG TCT TAG TCA               | 542301                         |

**TABLE S7. Summary of TILLING screen size and isolated mutants**

| <b>Gene ID</b>        | <b>Estimated<br/>Screen Size<br/>(N)</b> | <b>Total no. of<br/>mutants</b> | <b>No. of silent<br/>mutants</b> | <b>No. of<br/>missense<br/>mutants</b> | <b>No. of<br/>nonsense<br/>mutants</b> |
|-----------------------|------------------------------------------|---------------------------------|----------------------------------|----------------------------------------|----------------------------------------|
| <i>tc0431 (MACPF)</i> | 64                                       | 68                              | 13                               | 55                                     | 0                                      |
| <i>tc0437</i>         | 33                                       | 20                              | 4                                | 14                                     | 2                                      |
| <i>tc0438</i>         | 55                                       | 30                              | 9                                | 20                                     | 1                                      |
| <i>tc0439</i>         | 36                                       | 47                              | 8                                | 37                                     | 2                                      |
| <i>tc0440 (PLD)</i>   | 48                                       | 43                              | 11                               | 28                                     | 4                                      |
| <i>tc0441(add)</i>    | 42                                       | 13                              | 3                                | 9                                      | 1                                      |
| <i>tc0442(guaA)</i>   | 94                                       | 12                              | 0                                | 10                                     | 2                                      |
| <i>tc0443(guaB)</i>   | 94                                       | 8                               | 1                                | 6                                      | 1                                      |

**TABLE S8. SNPs in *C. muridarum* tc0437 mutant**

| Gene ID | Description                                                  | Nucleotide Position | Nucleotide Change | Amino acid Change |
|---------|--------------------------------------------------------------|---------------------|-------------------|-------------------|
| tc008   | exodeoxyribonuclease V, gamma subunit                        | 13703               | G → A             | Thr → Ile         |
| tc0019  | recA                                                         | 26275               | G → A             | Glu → Lys         |
| tc0035  | hypothetical protein                                         | 40681               | G → A             | Leu → Leu         |
| tc0069  | endonuclease III                                             | 80096               | C → T             | Pro → Ser         |
| tc0074  | preprotein translocase SecA subunit; secA                    | 85403               | C → T             | Arg → Cys         |
| tc0096  | ribosomal large subunit pseudouridine synthase B; rluB       | 115068              | G → A             | Gly → Gly         |
| tc0120  | hypothetical protein                                         | 144193              | C → T             | Arg → Cys         |
| tc0125  | alanyl-tRNA synthetase                                       | 153963              | G → A             | Ala → Val         |
| tc0137  | murF                                                         | 168334              | C → T             | Leu → Leu         |
| tc0159  | primosomal protein N                                         | 193263              | G → A             | Arg → Arg         |
| tc0172  | conserved hypothetical protein                               | 202909              | G → A             | Gly → Glu         |
| tc0213  | CDP-diacylglycerol--serine O-phosphatidyltransferase         | 252676              | C → T             | Met → Ile         |
| tc0218  | UDP-N-acetylenolpyruvoylglucosamine reductase; murB          | 260165              | G → A             | Ser → Phe         |
| tc0237  | hypothetical protein                                         | 277523              | G → A             | Arg → Cys         |
| tc0283  | PhoH-related protein                                         | 338843              | C → T             | Gly → Arg         |
| tc0290  | hypothetical protein                                         | 349249              | C → T             | Arg → Lys         |
| tc0330  | protein export protein, FHIPEP family protein                | 391857              | C → T             | Arg → Trp         |
| tc0383  | A/G-specific adenine glycosylase                             | 444982              | A → G             | Thr → Ala         |
| tc0412  | conserved hypothetical protein                               | 473585              | C → T             | Gln → STOP        |
| tc0424  | conserved hypothetical protein                               | 487908              | C → T             | Ala → Val         |
| tc0437  | adherence factor                                             | 506777              | C → T             | Gln → STOP        |
| tc0438  | adherence factor                                             | 520769              | G → A             | Arg → Gln         |
| tc0453  | hypothetical protein                                         | 551457              | G → A             | Arg → Arg         |
| tc0460  | thymidylate kinase                                           | 558168              | C → T             | Glu → Lys         |
| tc0469  | hypothetical protein                                         | 569879              | C → T             | Ala → Val         |
| tc0471  | peptide ABC transporter, periplasmic peptide-binding protein | 572022              | C → T             | Thr → Ile         |
| tc0479  | pfkA-2, beta subunit                                         | 581345              | G → A             | Glu → Lys         |
| tc0490  | Rep helicase family protein; uvrD                            | 596078              | G → A             | Ser → Ser         |
| tc0501  | sodium:dicarboxylate symporter family protein                | 607577              | C → T             | Ser → Phe         |
| tc0544  | hypothetical protein                                         | 654353              | G → A             | Ile → Ile         |
| tc0575  | serine/threonine kinase protein                              | 684627              | G → A             | Ala → Ala         |
| tc0588  | DNA-directed RNA polymerase, beta subunit; rpoC              | 702107              | G → A             | Leu → Phe         |
| tc0635  | hypothetical protein                                         | 761471              | C → T             | Glu → Gln         |
| tc0645  | 3-phosphoshikimate 1-carboxyvinyltransferase; aroA           | 772383              | G → A             | Lys → Phe         |
| tc0694  | polymorphic membrane protein B/C family protein; pmpB/C-1    | 829608              | C → T             | Asn → Asn         |
| tc0694  | polymorphic membrane protein B/C family protein; pmpB/C-1    | 831869              | C → T             | Ser → Phe         |
| tc0733  | secDF protein                                                | 872206              | G → A             | Asp → Asp         |
| tc0810  | ribosomal protein, L22; rplV                                 | 945533              | C → T             | Gly → Arg         |
| tc0816  | hypothetical protein                                         | 949915              | C → T             | Thr → Thr         |
| tc0833  | uracil phosphoribosyltransferase; upp                        | 969350              | G → A             | Gly → Arg         |
| tc0842  | branched-chain amino acid transport system carrier protein   | 977030              | G → A             | Gly → Glu         |
| tc0864  | DNA mismatch repair protein MutL                             | 1001277             | G → A             | Leu → Phe         |
| tc0877  | regulatory protein                                           | 1016507             | C → T             | His → Tyr         |
| tc0917  | geranylgeranyl pyrophosphate synthase                        | 1069215             | G → A             | Leu → Leu         |

**TABLE S9. SNPs in *C. muridarum* tc0438 mutant**

| Gene ID | Description                                                  | Nucleotide Position | Nucleotide Change | Amino acid Change |
|---------|--------------------------------------------------------------|---------------------|-------------------|-------------------|
| tc0019  | recA                                                         | 26275               | G → A             | Glu → Lys         |
| tc0064  | phosphate permease family protein                            | 74467               | G → A             | Arg → Lys         |
| tc0121  | protoporphyrinogen oxidase; hemY                             | 146183              | G → A             | Ser → Phe         |
| tc0125  | alanyl-tRNA synthetase                                       | 153963              | G → A             | Ala → Val         |
| tc0137  | murF                                                         | 168503              | G → A             | Gly → Arg         |
| tc0147  | tRNA delta-2-isopentenylpyrophosphate transferase            | 179316              | G → A             | Glu → Lys         |
| tc0186  | ribosomal protein L9                                         | 218818              | G → A             | Glu → Lys         |
| tc0214  | ribonucleoside-diphosphate reductase, alpha subunit          | 255549              | C → T             | His → His         |
| tc0218  | UDP-N-acetylenolpyruvoylglucosamine reductase; murB          | 260165              | G → A             | Ser → Phe         |
| tc0237  | hypothetical protein                                         | 277523              | G → A             | Arg → Cys         |
| tc0283  | PhoH-related protein                                         | 338843              | C → T             | Gly → Arg         |
| tc0294  | signal recognition particle protein                          | 352693              | G → A             | Asp → Asn         |
| tc0330  | protein export protein, FHIPEP family protein                | 391857              | C → T             | Arg → Trp         |
| tc0404  | adenylate kinase; adk                                        | 464247              | G → A             | Thr → Thr         |
| tc0412  | hypothetical protein                                         | 473585              | C → T             | Gln → STOP        |
| tc0425  | monooxygenase-related protein                                | 491242              | G → A             | Ser → Phe         |
| tc0438  | adherence factor                                             | 516403              | C → T             | Gln → STOP        |
| tc0438  | adherence factor                                             | 519122              | C → T             | Ser → Phe         |
| tc0438  | adherence factor                                             | 520769              | G → A             | Arg → Gln         |
| tc0438  | adherence factor                                             | 525326              | G → A             | Arg → Lys         |
| tc0450  | hypothetical protein                                         | 549083              | C → T             | Arg → STOP        |
| tc0471  | peptide ABC transporter, periplasmic peptide-binding protein | 572022              | C → T             | Thr → Ile         |
| tc0575  | serine/threonine kinase protein                              | 684627              | G → A             | Ala → Ala         |
| tc0580  | ATP synthase subunit D; atpD                                 | 693778              | G → A             | Leu → Phe         |
| tc0588  | DNA-directed RNA polymerase, beta subunit; rpoC              | 702107              | G → A             | Leu → Phe         |
| tc0635  | hypothetical protein                                         | 761916              | C → T             | Glu → Lys         |
| tc0644  | hypothetical protein                                         | 771460              | C → T             | Asp → Asn         |
| tc0645  | 3-phosphoshikimate 1-carboxyvinyltransferase; aroA           | 772383              | G → A             | Lys → Phe         |
| tc0666  | hypothetical protein                                         | 795149              | G → A             | Arg → Gln         |
| tc0671  | hypothetical protein                                         | 800641              | C → A             | Gly → Asp         |
| tc0681  | sodium:dicarboxylate symporter family protein                | 813777              | G → A             | Pro → Ser         |
| tc0694  | polymorphic membrane protein B/C family; pmpB/C-1            | 828687              | C → T             | Ser → Ser         |
| tc0694  | polymorphic membrane protein B/C family; pmpB/C-1            | 828944              | G → A             | Gly → Asp         |
| tc0833  | uracil phosphoribosyltransferase, upp                        | 969350              | G → A             | Gly → Arg         |
| tc0877  | regulatory protein, putative                                 | 1016507             | C → T             | His → Tyr         |

**TABLE S10. SNPs in *C. muridarum* tc0439 mutant**

| Gene ID | Description                                       | Nucleotide Position | Nucleotide Change | Amino acid Change |
|---------|---------------------------------------------------|---------------------|-------------------|-------------------|
| tc0044  | serine/threonine protein kinase                   | 50222               | G → A             | Val → Val         |
| tc0054  | penicillin-binding protein                        | 62823               | G → A             | Gly → Glu         |
| TC0084  | hypothetical protein                              | 101889              | G → A             | Asp → Asn         |
| -       | intergenic                                        | 126188              | C → T             | -                 |
| tc0191  | hypothetical protein                              | 224779              | G → A             | Gly → Gly         |
| tc0197  | polymorphic membrane protein; pmpD                | 233168              | G → A             | Glu → Lys         |
| tc0226  | hypothetical protein                              | 265848              | G → A             | Cys → Cys         |
| tc0230  | polyribonucleotide nucleotidyltransferase; pnpA   | 273825              | G → A             | Ser → Ser         |
| tc0244  | fumarate hydratase; fumC                          | 284699              | G → A             | Glu → Lys         |
| tc0249  | penicillin tolerance protein; lytB                | 291424              | C → T             | Arg → Trp         |
| tc0250  | hypothetical protein                              | 292616              | C → T             | Val → Ile         |
| tc0290  | hypothetical protein                              | 349120              | G → A             | Ser → Phe         |
| tc0312  | glycosyl hydrolase                                | 369812              | G → A             | Ser → Phe         |
| tc0390  | hypothetical protein                              | 455441              | G → A             | Glu → Lys         |
| tc0414  | hypothetical protein                              | 474899              | C → T             | Ser → Leu         |
| tc0439  | adherence factor                                  | 527311              | C → T             | Gln → STOP        |
| tc0472  | peptide ABC transporter, permease protein         | 573799              | C → T             | Pro → Leu         |
| tc0521  | chromosomal replication initiator protein; dnaA   | 630193              | C → T             | Val → Val         |
| tc0521  | chromosomal replication initiator protein; dnaA   | 630703              | G → A             | Phe → Phe         |
| tc0576  | valyl-tRNA synthetase                             | 687755              | C → T             | Lys → Lys         |
| tc0588  | DNA-directed RNA polymerase, beta subunit; rpoC   | 702342              | G → A             | Asn → Asn         |
| tc0600  | hypothetical protein                              | 716734              | G → A             | Ser → Phe         |
| tc0600  | hypothetical protein                              | 717761              | G → A             | Gln → STOP        |
| tc0695  | polymorphic membrane protein B/C family; pmpB/C-2 | 837382              | G → A             | Thr → Thr         |
| tc0716  | serine hydroxymethyltransferase; glyA             | 853750              | C → T             | Val → Val         |
| -       | intergenic                                        | 869958              | C → T             | -                 |
| tc0732  | ssDNA-specific exonuclease; recJ                  | 870022              | C → T             | Gln → His         |
| -       | intergenic                                        | 920321              | C → T             | -                 |

**TABLE S11. SNPs in *C. muridarum* tc0440 mutant**

| Gene ID | Description                                                   | Nucleotide Position | Nucleotide Change | Amino acid Change |
|---------|---------------------------------------------------------------|---------------------|-------------------|-------------------|
| tc0076  | GTP-binding protein EngA; yfgk                                | 88283               | C → T             | Gly → Ser         |
| tc0108  | sodium/alanine symporter family protein                       | 127881              | G → A             | Val → Val         |
| tc0124  | transcription-repair coupling factor; trcF                    | 150150              | G → A             | Asp → Asp         |
| tc0192  | glycerol-3-phosphate acyltransferase                          | 225336              | G → A             | Asp → Asp         |
| tc0212  | hypothetical protein                                          | 251161              | C → T             | Met → Ile         |
| tc0286  | hypothetical protein                                          | 342465              | G → A             | Thr → Ile         |
| tc0322  | coproporphyrinogen III oxidase                                | 380857              | G → A             | Leu → Phe         |
| tc0355  | hypothetical protein                                          | 415946              | C → T             | Pro → Leu         |
| tc0408  | hypothetical protein                                          | 469557              | G → A             | Arg → Cys         |
| tc0437  | adherence factor/cytotoxin                                    | 508662              | C → T             | Ser → Leu         |
| tc0440  | putative phospholipase D                                      | 537373              | C → T             | Gln → STOP        |
| tc0464  | hypothetical protein                                          | 564839              | G → A             | Ser → Leu         |
| tc0477  | diphosphate-fructose-6-phosphate 1-phosphotransferase; pfkA-1 | 580008              | G → A             | Arg → Gln         |
| tc0532  | DNA polymerase III subunit epsilon                            | 643156              | G → A             | Val → Ile         |
| tc0535  | ABC transporter ATP-binding protein                           | 645392              | C → T             | Leu → Leu         |
| tc0554  | glycine cleavage system protein H; gcvH                       | 663397              | C → T             | Gly → Asp         |
| tc0561  | hypothetical protein                                          | 672063              | C → T             | Ile → Ile         |
| tc0575  | serine/threonine-protein kinase; pknD                         | 686396              | G → A             | Pro → Ser         |
| tc0579  | V-type ATP synthase subunit I                                 | 692340              | G → A             | Thr → Thr         |
| tc0579  | V-type ATP synthase subunit I                                 | 692683              | C → T             | Arg → Gln         |
| tc0588  | DNA-directed RNA polymerase subunit beta; rpoC                | 701622              | C → T             | Arg → Arg         |
| tc0602  | helicase                                                      | 721695              | G → A             | Thr → Ile         |
| tc0605  | exodeoxyribonuclease VII large subunit; xseA                  | 724506              | G → A             | Gly → Glu         |
| tc0610  | excinuclease ABC subunit A; uvrA                              | 735281              | C → T             | Leu → Phe         |
| tc0617  | hypothetical protein                                          | 740043              | C → T             | Ser → Ser         |
| tc0635  | hypothetical protein                                          | 762982              | G → A             | Arg → Arg         |
| tc0650  | hypothetical protein                                          | 777433              | C → T             | Ala → Val         |
| tc0676  | VacB/Rnb family exoribonuclease                               | 809172              | C → T             | Ser → Ser         |
| tc0690  | sodium/alanine symporter family protein                       | 820643              | C → T             | Ser → Ser         |
| tc0697  | ABC transporter ATP-binding protein                           | 839505              | C → T             | Asp → Asp         |
| tc0706  | hemolysin                                                     | 845268              | C → T             | Arg → Arg         |
| tc0733  | preprotein translocase subunit SecD/SecF                      | 875842              | G → A             | Arg → Arg         |
| -       | intergenic                                                    | 876181              | C → T             | -                 |
| tc0737  | cytidylate kinase; cmk                                        | 879394              | C → T             | Ser → Ser         |
| tc0814  | 50S ribosomal protein L4; rplD                                | 947444              | C → T             | Arg → Lys         |
| -       | intergenic                                                    | 953298              | C → T             | -                 |
| tc0864  | DNA mismatch repair protein; mutL                             | 1000005             | G → A             | Gln → STOP        |
| tc0873  | hypothetical protein                                          | 1011011             | C → T             | Leu → Phe         |
| tc0886  | ExbD/ToIR family protein                                      | 1030795             | C → T             | Ser → Phe         |
| tc0911  | hypothetical protein                                          | 1057937             | C → T             | Val → Ile         |

**TABLE S12. SNPs in *C. muridarum* add mutant**

| Gene ID | Description                                                  | Nucleotide Position | Nucleotide Change | Amino acid Change |
|---------|--------------------------------------------------------------|---------------------|-------------------|-------------------|
| tc0019  | recA protein                                                 | 26275               | G → A             | Glu → Lys         |
| tc0035  | hypothetical protein                                         | 40681               | G → A             | Leu → Leu         |
| tc0069  | endonuclease III; nth                                        | 80096               | C → T             | Ala → Thr         |
| tc0098  | BirA-related protein                                         | 116059              | C → T             | Leu → Phe         |
| tc0120  | hypothetical protein                                         | 144193              | C → T             | Arg → Cys         |
| tc0125  | alanyl-tRNA synthetase; alaS                                 | 153963              | G → A             | Ala → Val         |
| -       | intergenic                                                   | 183496              | T → C             | -                 |
| -       | intergenic                                                   | 227658              | C → T             | -                 |
| tc0218  | UDP-N-acetylenolpyruvoylglucosamine reductase; murB          | 260165              | G → A             | Ser → Phe         |
| tc0226  | hypothetical protein                                         | 266168              | G → A             | Pro → Ser         |
| tc0237  | hypothetical protein                                         | 277523              | G → A             | Arg → Cys         |
| tc0252  | type III secretion chaperone                                 | 295119              | G → A             | Leu → Leu         |
| tc0283  | PhoH-related protein                                         | 338843              | C → T             | Gly → Arg         |
| tc0306  | hypothetical protein                                         | 364225              | G → A             | Phe → Phe         |
| tc0330  | protein export protein, FHIPEP family                        | 391857              | C → T             | Arg → Trp         |
| tc0409  | hypothetical protein                                         | 470580              | G → A             | Ile → Ile         |
| tc0412  | hypothetical protein                                         | 473585              | C → T             | Gln → STOP        |
| tc0413  | serine esterase                                              | 474570              | C → T             | Ser → Phe         |
| tc0424  | hypothetical protein                                         | 487580              | C → T             | Leu → Phe         |
| tc0438  | adherence factor                                             | 520769              | G → A             | Arg → Gln         |
| tc0440  | phospholipase D family protein                               | 538075              | G → A             | Gly → Arg         |
| tc0441  | adenosine deaminase; add                                     | 539413              | G → A             | Gln → STOP        |
| tc0466  | magnesium transporter; mgtE                                  | 567943              | G → A             | Ser → Ser         |
| tc0471  | peptide ABC transporter, periplasmic peptide-binding protein | 572022              | C → T             | Thr → Ile         |
| tc0477  | pfkA-1, beta subunit                                         | 579586              | G → A             | Glu → Glu         |
| tc0479  | pfkA-2, beta subunit                                         | 581345              | G → A             | Glu → Lys         |
| tc0490  | UvrD/REP helicase family protein                             | 596078              | G → A             | Ser → Ser         |
| tc0490  | UvrD/REP helicase family protein                             | 596953              | C → T             | Asp → Asn         |
| tc0492  | 4-hydroxybenzoate octaprenyltransferase; ubiA                | 599868              | C → T             | Pro → Leu         |
| tc0575  | serine/threonine protein kinase                              | 684627              | G → A             | Ala → Ala         |
| tc0588  | DNA-directed RNA polymerase, beta` subunit; rpoC             | 702107              | G → A             | Leu → Phe         |
| tc0603  | N-(5'-phosphoribosyl)-anthranilate isomerase; trpF           | 723235              | C → T             | Gly → Ser         |
| tc0629  | hypothetical protein                                         | 753985              | G → A             | Glu → Lys         |
| tc0645  | 3-phosphoshikimate 1-carboxyvinyltransferase; aroA           | 772383              | G → A             | Lys → Lys         |
| tc0649  | 3-dehydroquininate dehydratase/shikimate 5-dehydrogenase     | 776683              | C → T             | Gly → Ser         |
| tc0674  | grpE protein                                                 | 804884              | C → T             | Pro → Leu         |
| tc0699  | GTP-binding protein, GTP1/Obg family                         | 841076              | C → T             | Ala → Ala         |
| tc0715  | ATP-dependent Clp protease, proteolytic subunit; clpP-2      | 853202              | C → T             | Leu → Leu         |
| tc0828  | peptidyl-prolyl cis-trans isomerase; mip                     | 959089              | C → T             | Glu → Lys         |
| tc0833  | uracil phosphoribosyltransferase; upp                        | 969350              | G → A             | Gly → Arg         |
| tc0877  | regulatory protein                                           | 1016507             | C → T             | His → Tyr         |
| tc0917  | geranylgeranyl pyrophosphate synthase                        | 1069215             | G → A             | Leu → Leu         |

**TABLE S13. SNPs in *C. muridarum guaA* mutant**

| Gene ID       | Description                                                | Nucleotide Position | Nucleotide Change | Amino acid Change |
|---------------|------------------------------------------------------------|---------------------|-------------------|-------------------|
| <i>tc0001</i> | delta-aminolevulinic acid dehydratase; hemB                | 576                 | G → A             | Cys → Tyr         |
| <i>tc0024</i> | hypothetical protein                                       | 31399               | G → A             | Pro → Ser         |
| <i>tc0032</i> | DNA gyrase, subunit B; gyrB-1                              | 36506               | G → A             | Pro → Leu         |
| <i>tc0059</i> | aminotransferase, class V                                  | 69061               | G → A             | Val → Ile         |
| <i>tc0089</i> | hypothetical protein                                       | 108562              | G → A             | Leu → Leu         |
| <i>tc0108</i> | sodium/alanine symporter family protein                    | 128662              | G → A             | Ala → Pro         |
| <i>tc0112</i> | cell division protein FtsK, putative                       | 131865              | G → A             | Ile → Ile         |
| <i>tc0123</i> | uroporphyrinogen decarboxylase; hemE                       | 148454              | G → A             | Pro → Pro         |
| <i>tc0124</i> | transcription-repair coupling factor; trcF                 | 151261              | C → T             | Gly → Glu         |
| -             | intergenic                                                 | 182756              | G → A             | -                 |
| <i>tc0193</i> | ribonuclease G; cafA                                       | 226211              | G → A             | His → Tyr         |
| <i>tc0196</i> | fatty acid/phospholipid synthesis protein; plsX            | 229357              | G → A             | Val → Met         |
| -             | intergenic                                                 | 239576              | G → A             | -                 |
| <i>tc0284</i> | hypothetical protein                                       | 340204              | C → T             | Leu → Phe         |
| <i>tc0322</i> | oxygen-independent coproporphyrinogen III oxidase; HemN    | 380626              | G → A             | Pro → Ser         |
| <i>tc0333</i> | 6-phosphogluconate dehydrogenase, decarboxylatin; pgd      | 395612              | G → A             | Thr → Thr         |
| <i>tc0383</i> | A/G-specific adenine glycosylase; mutY                     | 445590              | G → A             | Asp → Asn         |
| <i>tc0442</i> | GMP synthase; <i>guaA</i>                                  | 540375              | G → A             | Gln → STOP        |
| <i>tc0527</i> | hypothetical protein                                       | 637749              | G → A             | Val → Ile         |
| <i>tc0550</i> | NADH:ubiquinone oxidoreductase, subunit B                  | 659443              | C → T             | Pro → Pro         |
| -             | intergenic                                                 | 667975              | G → A             | -                 |
| <i>tc_t24</i> | tRNA                                                       | 712252              | C → T             | -                 |
| <i>tc0610</i> | excinuclease ABC, subunit A; uvrA                          | 734634              | C → T             | Ser → Ser         |
| <i>tc0623</i> | protease, Lon family                                       | 747850              | C → T             | Ser → Ser         |
| <i>tc0651</i> | hypothetical protein                                       | 778747              | C → T             | Ser → Phe         |
| -             | intergenic                                                 | 816010              | G → A             | -                 |
| <i>tc0694</i> | polymorphic membrane protein B/C family; pmpB/C-1          | 830732              | C → T             | Ser → Phe         |
| <i>tc0721</i> | translation elongation factor G; fusA                      | 859591              | G → A             | Pro → Ser         |
| <i>tc0733</i> | secDF protein, putative                                    | 874619              | G → A             | Pro → Leu         |
| <i>tc0759</i> | hypothetical protein                                       | 899994              | C → T             | Asp → Asp         |
| <i>tc0764</i> | peptide ABC transporter, permease protein                  | 907437              | C → A             | Val → Val         |
| <i>tc0791</i> | hypothetical protein                                       | 934794              | C → T             | Asp → Asn         |
| <i>tc0823</i> | DNA polymerase III, epsilon subunit                        | 955910              | C → T             | Gly → Glu         |
| <i>tc0842</i> | branched-chain amino acid transport system carrier protein | 976805              | C → T             | Pro → Leu         |
| <i>tc0843</i> | helicase, Snf2 family                                      | 981172              | T → G             | Ser → Ala         |
| <i>tc0903</i> | folK/P                                                     | 1046666             | G → A             | His → Tyr         |
| <i>tc0906</i> | hypothetical protein                                       | 1049784             | G → A             | Ser → Leu         |
| <i>tc0916</i> | hypothetical protein                                       | 1067874             | C → T             | Ala → Val         |



**TABLE S14. SNPs in *C. muridarum guaB* mutant**

| Gene ID        | Description                                   | Nucleotide Position | Nucleotide Change | Amino acid Change |
|----------------|-----------------------------------------------|---------------------|-------------------|-------------------|
| <i>tc0054</i>  | penicillin-binding protein                    | 62823               | G → A             | Gly → Glu         |
| <i>tc0092</i>  | hypothetical protein                          | 110539              | C → T             | Glu → Lys         |
| -              | intergenic                                    | 126188              | C → T             | -                 |
| <i>tc0125</i>  | alanyl-tRNA synthetase; alaS                  | 152652              | C → T             | Gly → Glu         |
| <i>tc0181</i>  | glycogen synthase; glgA                       | 214991              | G → A             | Ala → Val         |
| <i>tc0191</i>  | hypothetical protein                          | 224779              | G → A             | Gly → Gly         |
| <i>tc0197</i>  | polymorphic membrane protein D family; pmpD   | 233168              | G → A             | Glu → Lys         |
| <i>tc0228</i>  | MesJ/Ycf62 family protein                     | 268437              | G → A             | Glu → Lys         |
| <i>tc0250</i>  | hypothetical protein                          | 292616              | C → T             | Val → Ile         |
| <i>tc0263</i>  | polymorphic membrane protein G family; pmpG-1 | 312471              | G → A             | Asp → Asn         |
| <i>tc0285</i>  | hypothetical protein                          | 341031              | C → T             | Ser → Phe         |
| <i>tc0290</i>  | hypothetical protein                          | 349120              | G → A             | Ser → Phe         |
| <i>tc0312</i>  | glycosyl hydrolase family protein             | 369812              | G → A             | Ser → Phe         |
| <i>tc0319</i>  | hypothetical protein                          | 376782              | C → T             | Ser → Phe         |
| <i>tc0331</i>  | RNA polymerase sigma factor, sigma-70 family  | 392203              | C → T             | His → His         |
| <i>tc0410</i>  | hypothetical protein                          | 471306              | C → T             | Thr → Thr         |
| <i>tc0415</i>  | dipeptidase                                   | 475870              | C → T             | Val → Val         |
| <i>tc0439</i>  | adherence factor                              | 536039              | G → A             | Gly → Asp         |
| <i>tc0443</i>  | inosine-5'-monophosphate dehydrogenase        | 541698              | G → A             | Gln → STOP        |
| <i>tc0473</i>  | peptide ABC transporter, permease protein     | 573799              | C → T             | Pro → Leu         |
| <i>tc0504</i>  | hypothetical protein                          | 610197              | C → T             | Pro → Leu         |
| <i>tc0511</i>  | recombination protein RecR                    | 617540              | C → T             | Phe → Phe         |
| <i>tcC0553</i> | NADH:ubiquinone oxidoreductase, subunit E     | 662309              | C → T             | Ser → Phe         |
| <i>tc0600</i>  | hypothetical protein                          | 717761              | G → A             | Gln → STOP        |
| <i>tc0610</i>  | excinuclease ABC, subunit A; uvrA             | 732712              | G → A             | Pro → Pro         |
| <i>tc0676</i>  | exoribonuclease, VacB/Rnb family              | 808732              | G → A             | Ile → Ile         |
| -              | intergenic                                    | 866802              | G → A             | -                 |
| <i>tc0777</i>  | hypothetical protein                          | 918927              | G → A             | Gly → Glu         |
| <i>tc0909</i>  | hypothetical protein                          | 1052698             | C → T             | Gly → Gly         |
